# Supplementary material
Source: publisher figshare collection journal article supplement (https://acs.figshare.com/ndownloader/files/4227856)
Supplement: Supplementary file 1 [file 4227856]

data_40a_dax19
_audit_creation_date              2010-11-24
_audit_creation_method
;
  Olex2 1.1-beta
  (compiled 2010.10.26 svn.r1482, GUI svn.r3310)
;

_publ_contact_author_name         'Dmitry Yufit'
_publ_contact_author_address
;
Department of Chemistry
Durham University
South Rd.
Durham
DH1 3LE
UK
;
_publ_contact_author_email        'd.s.yufit@durham.ac.uk'

_publ_requested_journal           'J.Org.Chem.'


_publ_contact_letter
;
The CIF file contains data for the structure 40a from
the paper 

"Non-concerted Cycloaddition of 2H-Aziridines to Acylketenes - 
a Route to Bridged O,N-heterocycles"

by  A.F.Khlebnikov, M.S.Novikov,V.V.Pakalnis and D.S.Yufit. 

The paper will be submitted to J.Org.Chem.
;
loop_
_publ_author_name
_publ_author_address
'Khlebnikov, Alexander F.'
;
Department of Chemistry
Saint-Petersburg State University
Universitetskii pr. 26
198504
St.Petersburg
Russia
;
'Novikov, Mikhail S.'
;
Department of Chemistry
Saint-Petersburg State University
Universitetskii pr. 26
198504
St.Petersburg
Russia
;
'Pakalnis, Viktoria V.'
;
Department of Chemistry
Saint-Petersburg State University
Universitetskii pr. 26
198504
St.Petersburg
Russia
;
'Yufit, Dmitry S.'
;
Department of Chemistry
Durham University
South Rd.
Durham
DH1 3LE
UK
;
_chemical_name_common             ?
_chemical_name_systematic
;
(Z)-Methyl 3-(5-oxo-2,6,7-triphenyl-2,3,4,5-tetrahydro-1,4-oxazepin-2-yloxy)-
2,3-diphenylacrylate
;
_chemical_formula_moiety          'C39 H31 N O5, C2 H6 O'
_chemical_formula_sum             'C41 H37 N O6'
_chemical_formula_weight          639.72
_chemical_melting_point           ?
loop_
  _atom_type_symbol
  _atom_type_description
  _atom_type_scat_dispersion_real
  _atom_type_scat_dispersion_imag
  _atom_type_scat_source
 'C' 'C' 0.0033 0.0016 'International Tables Vol C Tables 4.2.6.8 and 6.1.1.4'
 'H' 'H' 0.0000 0.0000 'International Tables Vol C Tables 4.2.6.8 and 6.1.1.4'
 'N' 'N' 0.0061 0.0033 'International Tables Vol C Tables 4.2.6.8 and 6.1.1.4'
 'O' 'O' 0.0106 0.0060 'International Tables Vol C Tables 4.2.6.8 and 6.1.1.4'

_space_group_crystal_system       'triclinic'
_space_group_IT_number            2
_space_group_name_H-M_alt         'P -1'
_space_group_name_Hall            '-P 1'
loop_
  _space_group_symop_id
  _space_group_symop_operation_xyz
 1 'x, y, z'
 2 '-x, -y, -z'

_cell_length_a                    10.1297(3)
_cell_length_b                    12.8314(4)
_cell_length_c                    14.6074(4)
_cell_angle_alpha                 96.969(10)
_cell_angle_beta                  104.944(10)
_cell_angle_gamma                 106.416(10)
_cell_volume                      1720.58(12)
_cell_formula_units_Z             2
_cell_measurement_reflns_used     5207
_cell_measurement_temperature     120.0
_cell_measurement_theta_max       29.695
_cell_measurement_theta_min       2.202
_exptl_absorpt_coefficient_mu     0.082
_exptl_absorpt_correction_T_max   ?
_exptl_absorpt_correction_T_min   ?
_exptl_absorpt_correction_type    'none'
_exptl_absorpt_process_details    ?
_exptl_crystal_colour             less
_exptl_crystal_colour_lustre      dull
_exptl_crystal_colour_modifier    whitish
_exptl_crystal_colour_primary     colourless
_exptl_crystal_density_diffrn     1.235
_exptl_crystal_density_meas       ?
_exptl_crystal_density_method     'not measured'
_exptl_crystal_description        blob
_exptl_crystal_F_000              676
_exptl_crystal_size_max           0.22
_exptl_crystal_size_mid           0.2
_exptl_crystal_size_min           0.08
_exptl_special_details
;
 The data collection nominally covered a full sphere of reciprocal space by
 a combination of 5 sets of \w scans each set at different \f and/or
 2\q angles and each scan (20.00 s exposure) covering -0.300\ degrees in \w.
 The crystal to detector distance was 4.85 cm.
;
_diffrn_reflns_av_R_equivalents   0.0657
_diffrn_reflns_av_unetI/netI      0.0724
_diffrn_reflns_limit_h_max        14
_diffrn_reflns_limit_h_min        -14
_diffrn_reflns_limit_k_max        17
_diffrn_reflns_limit_k_min        -16
_diffrn_reflns_limit_l_max        20
_diffrn_reflns_limit_l_min        -20
_diffrn_reflns_number             26722
_diffrn_reflns_theta_full         29.50
_diffrn_reflns_theta_max          29.50
_diffrn_reflns_theta_min          1.48
_diffrn_ambient_temperature       120.0
_diffrn_detector                  'CCD area detector'
_diffrn_detector_area_resol_mean  5.6
_diffrn_detector_type             'Bruker SMART CCD 6000 area detector'
_diffrn_measured_fraction_theta_full 1.000
_diffrn_measured_fraction_theta_max 1.000
_diffrn_measurement_device        'three-circle diffractometer'
_diffrn_measurement_device_type   'Bruker SMART CCD 6000 area detector'
_diffrn_measurement_method        '\w scans'
_diffrn_radiation_monochromator   graphite
_diffrn_radiation_probe           x-ray
_diffrn_radiation_source          'fine-focus sealed tube'
_diffrn_radiation_type            MoK\a
_diffrn_radiation_wavelength      0.71073
_diffrn_radiation_xray_symbol     K-L~3~
_diffrn_source                    'sealed X-ray tube'
_diffrn_source_current            5.0
_diffrn_source_power              0.1
_diffrn_source_target             Mo
_diffrn_source_voltage            20.0
_diffrn_standards_decay_%         ?
_diffrn_standards_interval_count  ?
_diffrn_standards_interval_time   ?
_diffrn_standards_number          ?
_reflns_number_gt                 5796
_reflns_number_total              9595
_reflns_threshold_expression      >2sigma(I)
_computing_cell_refinement        'SAINT v6.45A (Bruker, 2003)'
_computing_data_collection        'SMART v5.625 (Bruker, 2001)'
_computing_data_reduction         'SAINT v6.45A (Bruker, 2003)'
_computing_molecular_graphics
;
O. V. Dolomanov, L. J. Bourhis, R. J. Gildea, J. A. K. Howard and H. Puschmann,
OLEX2: a complete structure solution, refinement and analysis program.
J. Appl. Cryst. (2009). 42, 339-341.
;
_computing_publication_material
;
O. V. Dolomanov, L. J. Bourhis, R. J. Gildea, J. A. K. Howard and H. Puschmann,
OLEX2: a complete structure solution, refinement and analysis program.
J. Appl. Cryst. (2009). 42, 339-341.
;
_computing_structure_refinement   'SHELXL-97 (Sheldrick, 1997)'
_computing_structure_solution     'A short history of SHELX (Sheldrick, 2007)/Bruker'
_refine_diff_density_max          0.276
_refine_diff_density_min          -0.260
_refine_diff_density_rms          0.051
_refine_ls_extinction_coef        ?
_refine_ls_extinction_method      none
_refine_ls_goodness_of_fit_ref    0.921
_refine_ls_hydrogen_treatment     refall
_refine_ls_matrix_type            full
_refine_ls_number_parameters      581
_refine_ls_number_reflns          9595
_refine_ls_number_restraints      0
_refine_ls_R_factor_all           0.0827
_refine_ls_R_factor_gt            0.0441
_refine_ls_restrained_S_all       0.921
_refine_ls_shift/su_max           0.000
_refine_ls_shift/su_mean          0.000
_refine_ls_structure_factor_coef  Fsqd
_refine_ls_weighting_details      'calc w=1/[\s^2^(Fo^2^)+(0.0400P)^2^+0.0000P] where P=(Fo^2^+2Fc^2^)/3'
_refine_ls_weighting_scheme       calc
_refine_ls_wR_factor_gt           0.0889
_refine_ls_wR_factor_ref          0.0996
_refine_special_details
;
 Refinement of F^2^ against ALL reflections.  The weighted R-factor wR and 
 goodness of fit S are based on F^2^, conventional R-factors R are based 
 on F, with F set to zero for negative F^2^. The threshold expression of 
 F^2^ > 2sigma(F^2^) is used only for calculating R-factors(gt) etc. and is 
 not relevant to the choice of reflections for refinement.  R-factors based 
 on F^2^ are statistically about twice as large as those based on F, and R- 
 factors based on ALL data will be even larger. 
;
_atom_sites_solution_hydrogens    difmap
_atom_sites_solution_primary      direct
_atom_sites_solution_secondary    difmap
loop_
  _atom_site_label
  _atom_site_type_symbol
  _atom_site_fract_x
  _atom_site_fract_y
  _atom_site_fract_z
  _atom_site_U_iso_or_equiv
  _atom_site_adp_type
  _atom_site_occupancy
  _atom_site_symmetry_multiplicity
  _atom_site_calc_flag
  _atom_site_refinement_flags
  _atom_site_disorder_assembly
  _atom_site_disorder_group
 O1 O 0.19820(9) 0.17148(7) 0.07126(6) 0.02007(19) Uani 1 1 d . . .
 O1S O 0.19114(12) 0.58801(9) 0.08983(8) 0.0417(3) Uani 1 1 d . . .
 O2 O 0.44222(9) 0.24867(7) 0.16165(6) 0.02071(19) Uani 1 1 d . . .
 O3 O 0.00541(9) 0.30930(8) -0.11270(6) 0.0262(2) Uani 1 1 d . . .
 O4 O 0.83260(10) 0.39597(8) 0.24029(7) 0.0297(2) Uani 1 1 d . . .
 O5 O 0.65347(11) 0.46933(9) 0.22278(8) 0.0416(3) Uani 1 1 d . . .
 N1 N 0.20133(12) 0.37352(10) 0.02148(8) 0.0233(2) Uani 1 1 d . . .
 C1 C 0.11784(13) 0.30003(11) -0.06031(9) 0.0212(3) Uani 1 1 d . . .
 C1S C 0.32121(17) 0.66658(15) 0.15636(14) 0.0446(4) Uani 1 1 d . . .
 C2 C 0.16458(13) 0.20336(10) -0.08826(9) 0.0207(3) Uani 1 1 d . . .
 C2S C 0.3200(2) 0.67671(18) 0.25918(15) 0.0571(5) Uani 1 1 d . . .
 C3 C 0.20333(13) 0.14421(10) -0.02303(8) 0.0195(3) Uani 1 1 d . . .
 C4 C 0.30532(13) 0.26879(10) 0.13467(8) 0.0196(3) Uani 1 1 d . . .
 C5 C 0.33452(14) 0.36314(11) 0.07994(9) 0.0214(3) Uani 1 1 d . . .
 C6 C 0.50843(13) 0.24242(10) 0.25587(8) 0.0196(3) Uani 1 1 d . . .
 C7 C 0.64450(13) 0.31097(10) 0.29749(9) 0.0206(3) Uani 1 1 d . . .
 C8 C 0.70648(14) 0.40093(11) 0.24947(9) 0.0253(3) Uani 1 1 d . . .
 C9 C 0.90165(19) 0.47518(16) 0.18990(12) 0.0415(4) Uani 1 1 d . . .
 C10 C 0.15931(13) 0.17580(11) -0.19179(9) 0.0226(3) Uani 1 1 d . . .
 C11 C 0.07554(15) 0.07257(13) -0.25123(10) 0.0293(3) Uani 1 1 d . . .
 C12 C 0.08019(17) 0.04786(15) -0.34515(10) 0.0385(4) Uani 1 1 d . . .
 C13 C 0.16735(18) 0.12540(16) -0.38041(11) 0.0426(4) Uani 1 1 d . . .
 C14 C 0.24823(17) 0.22920(16) -0.32313(11) 0.0397(4) Uani 1 1 d . . .
 C15 C 0.24369(15) 0.25512(13) -0.22879(10) 0.0290(3) Uani 1 1 d . . .
 C16 C 0.23747(13) 0.04008(10) -0.04100(8) 0.0206(3) Uani 1 1 d . . .
 C17 C 0.17393(14) -0.05021(11) -0.00452(9) 0.0248(3) Uani 1 1 d . . .
 C18 C 0.20412(15) -0.14866(12) -0.02017(10) 0.0312(3) Uani 1 1 d . . .
 C19 C 0.29911(16) -0.15752(13) -0.07141(11) 0.0348(3) Uani 1 1 d . . .
 C20 C 0.36242(16) -0.06838(13) -0.10763(10) 0.0336(3) Uani 1 1 d . . .
 C21 C 0.33234(15) 0.02994(12) -0.09316(10) 0.0272(3) Uani 1 1 d . . .
 C22 C 0.25247(13) 0.29515(10) 0.21985(9) 0.0209(3) Uani 1 1 d . . .
 C23 C 0.33722(15) 0.38648(11) 0.29475(9) 0.0253(3) Uani 1 1 d . . .
 C24 C 0.29198(16) 0.40892(12) 0.37465(10) 0.0316(3) Uani 1 1 d . . .
 C25 C 0.16098(17) 0.34168(13) 0.37957(11) 0.0348(3) Uani 1 1 d . . .
 C26 C 0.07547(16) 0.25294(13) 0.30452(11) 0.0332(3) Uani 1 1 d . . .
 C27 C 0.12042(15) 0.22879(12) 0.22476(10) 0.0267(3) Uani 1 1 d . . .
 C28 C 0.43219(13) 0.15143(11) 0.29576(9) 0.0214(3) Uani 1 1 d . . .
 C29 C 0.44334(15) 0.16518(13) 0.39397(10) 0.0285(3) Uani 1 1 d . . .
 C30 C 0.38061(17) 0.07503(15) 0.43028(12) 0.0389(4) Uani 1 1 d . . .
 C31 C 0.30456(18) -0.02770(15) 0.36914(13) 0.0433(4) Uani 1 1 d . . .
 C32 C 0.28807(16) -0.04101(13) 0.27124(12) 0.0364(4) Uani 1 1 d . . .
 C33 C 0.35203(14) 0.04863(11) 0.23501(10) 0.0265(3) Uani 1 1 d . . .
 C34 C 0.74358(13) 0.30251(11) 0.38915(9) 0.0211(3) Uani 1 1 d . . .
 C35 C 0.80871(15) 0.39442(12) 0.46510(10) 0.0265(3) Uani 1 1 d . . .
 C36 C 0.89928(15) 0.38916(13) 0.55238(10) 0.0310(3) Uani 1 1 d . . .
 C37 C 0.92746(15) 0.29155(13) 0.56391(10) 0.0300(3) Uani 1 1 d . . .
 C38 C 0.86548(15) 0.19972(13) 0.48774(10) 0.0274(3) Uani 1 1 d . . .
 C39 C 0.77384(14) 0.20450(12) 0.40098(9) 0.0237(3) Uani 1 1 d . . .
 H1N H 0.1782(16) 0.4332(13) 0.0403(10) 0.037(4) Uiso 1 1 d . . .
 H1O H 0.1225(19) 0.6139(15) 0.0967(12) 0.055(5) Uiso 1 1 d . . .
 H1SA H 0.400(2) 0.6390(15) 0.1463(12) 0.057(5) Uiso 1 1 d . . .
 H1SB H 0.3390(18) 0.7405(15) 0.1369(12) 0.050(5) Uiso 1 1 d . . .
 H2SA H 0.306(2) 0.5998(19) 0.2786(15) 0.087(7) Uiso 1 1 d . . .
 H2SB H 0.234(2) 0.7021(16) 0.2696(14) 0.075(6) Uiso 1 1 d . . .
 H2SC H 0.411(2) 0.7340(18) 0.3014(14) 0.075(6) Uiso 1 1 d . . .
 H5A H 0.3937(14) 0.3499(11) 0.0386(9) 0.027(4) Uiso 1 1 d . . .
 H5B H 0.3897(15) 0.4321(12) 0.1263(10) 0.024(4) Uiso 1 1 d . . .
 H9A H 0.8400(17) 0.4597(13) 0.1215(12) 0.041(4) Uiso 1 1 d . . .
 H9B H 0.9163(18) 0.5537(16) 0.2216(12) 0.053(5) Uiso 1 1 d . . .
 H9C H 0.991(2) 0.4625(15) 0.1916(12) 0.056(5) Uiso 1 1 d . . .
 H11 H 0.0154(15) 0.0163(12) -0.2268(10) 0.033(4) Uiso 1 1 d . . .
 H12 H 0.0202(17) -0.0245(14) -0.3854(11) 0.041(4) Uiso 1 1 d . . .
 H13 H 0.1714(18) 0.1055(14) -0.4441(13) 0.055(5) Uiso 1 1 d . . .
 H14 H 0.3095(17) 0.2864(13) -0.3458(11) 0.045(5) Uiso 1 1 d . . .
 H15 H 0.2973(15) 0.3277(12) -0.1887(10) 0.030(4) Uiso 1 1 d . . .
 H17 H 0.1089(15) -0.0439(12) 0.0325(10) 0.034(4) Uiso 1 1 d . . .
 H18 H 0.1585(15) -0.2120(13) 0.0048(10) 0.033(4) Uiso 1 1 d . . .
 H19 H 0.3232(17) -0.2260(14) -0.0819(11) 0.046(5) Uiso 1 1 d . . .
 H20 H 0.4280(17) -0.0734(13) -0.1429(11) 0.043(4) Uiso 1 1 d . . .
 H21 H 0.3780(16) 0.0927(13) -0.1182(10) 0.036(4) Uiso 1 1 d . . .
 H23 H 0.4289(15) 0.4356(11) 0.2904(9) 0.022(3) Uiso 1 1 d . . .
 H24 H 0.3542(15) 0.4734(12) 0.4282(10) 0.032(4) Uiso 1 1 d . . .
 H25 H 0.1296(16) 0.3576(12) 0.4352(11) 0.041(4) Uiso 1 1 d . . .
 H26 H -0.0197(16) 0.2061(12) 0.3061(10) 0.036(4) Uiso 1 1 d . . .
 H27 H 0.0602(15) 0.1658(12) 0.1724(10) 0.035(4) Uiso 1 1 d . . .
 H29 H 0.4949(15) 0.2377(12) 0.4365(10) 0.026(4) Uiso 1 1 d . . .
 H30 H 0.3912(16) 0.0866(13) 0.4987(12) 0.042(4) Uiso 1 1 d . . .
 H31 H 0.2584(18) -0.0901(15) 0.3949(12) 0.053(5) Uiso 1 1 d . . .
 H32 H 0.2316(17) -0.1150(14) 0.2258(11) 0.047(5) Uiso 1 1 d . . .
 H33 H 0.3420(15) 0.0416(11) 0.1668(10) 0.027(4) Uiso 1 1 d . . .
 H35 H 0.7908(15) 0.4623(12) 0.4565(10) 0.029(4) Uiso 1 1 d . . .
 H36 H 0.9416(15) 0.4553(12) 0.6046(10) 0.029(4) Uiso 1 1 d . . .
 H37 H 0.9880(16) 0.2860(12) 0.6242(11) 0.038(4) Uiso 1 1 d . . .
 H38 H 0.8850(15) 0.1290(12) 0.4957(10) 0.028(4) Uiso 1 1 d . . .
 H39 H 0.7303(14) 0.1401(11) 0.3491(9) 0.023(3) Uiso 1 1 d . . .

loop_
  _atom_site_aniso_label
  _atom_site_aniso_U_11
  _atom_site_aniso_U_22
  _atom_site_aniso_U_33
  _atom_site_aniso_U_23
  _atom_site_aniso_U_13
  _atom_site_aniso_U_12
 O1 0.0206(4) 0.0197(5) 0.0186(4) 0.0021(4) 0.0060(3) 0.0055(4)
 O1S 0.0323(6) 0.0322(6) 0.0591(7) -0.0031(5) 0.0109(5) 0.0161(5)
 O2 0.0188(4) 0.0254(5) 0.0190(4) 0.0058(4) 0.0043(3) 0.0098(4)
 O3 0.0241(5) 0.0300(5) 0.0263(5) 0.0074(4) 0.0050(4) 0.0134(4)
 O4 0.0277(5) 0.0324(6) 0.0302(5) 0.0116(4) 0.0132(4) 0.0056(4)
 O5 0.0302(5) 0.0316(6) 0.0595(7) 0.0245(5) 0.0046(5) 0.0073(5)
 N1 0.0260(6) 0.0215(6) 0.0243(6) 0.0049(5) 0.0055(5) 0.0126(5)
 C1 0.0220(6) 0.0227(7) 0.0214(6) 0.0072(5) 0.0077(5) 0.0089(5)
 C1S 0.0298(8) 0.0339(10) 0.0665(12) 0.0043(9) 0.0085(8) 0.0131(7)
 C2 0.0186(6) 0.0218(7) 0.0209(6) 0.0033(5) 0.0050(5) 0.0069(5)
 C2S 0.0575(13) 0.0423(12) 0.0593(12) 0.0118(10) -0.0032(10) 0.0166(10)
 C3 0.0159(6) 0.0220(7) 0.0189(6) 0.0017(5) 0.0048(5) 0.0052(5)
 C4 0.0171(6) 0.0188(6) 0.0204(6) 0.0016(5) 0.0023(5) 0.0063(5)
 C5 0.0217(6) 0.0196(7) 0.0220(6) 0.0040(5) 0.0044(5) 0.0073(5)
 C6 0.0225(6) 0.0211(7) 0.0180(6) 0.0046(5) 0.0062(5) 0.0109(5)
 C7 0.0221(6) 0.0205(7) 0.0204(6) 0.0047(5) 0.0067(5) 0.0087(5)
 C8 0.0230(7) 0.0236(7) 0.0222(6) 0.0042(5) 0.0005(5) 0.0030(5)
 C9 0.0386(9) 0.0463(11) 0.0329(9) 0.0167(8) 0.0138(8) -0.0022(8)
 C10 0.0216(6) 0.0288(7) 0.0204(6) 0.0056(5) 0.0042(5) 0.0145(6)
 C11 0.0290(7) 0.0318(8) 0.0255(7) 0.0034(6) 0.0030(6) 0.0135(6)
 C12 0.0395(9) 0.0480(10) 0.0245(7) -0.0049(7) -0.0003(7) 0.0235(8)
 C13 0.0425(9) 0.0732(13) 0.0227(7) 0.0076(8) 0.0095(7) 0.0364(9)
 C14 0.0347(8) 0.0643(12) 0.0311(8) 0.0205(8) 0.0150(7) 0.0241(8)
 C15 0.0267(7) 0.0358(9) 0.0265(7) 0.0090(6) 0.0075(6) 0.0126(6)
 C16 0.0184(6) 0.0229(7) 0.0183(6) 0.0022(5) 0.0013(5) 0.0081(5)
 C17 0.0215(6) 0.0239(7) 0.0255(7) 0.0030(6) 0.0037(5) 0.0065(5)
 C18 0.0303(7) 0.0226(8) 0.0340(8) 0.0041(6) 0.0018(6) 0.0068(6)
 C19 0.0373(8) 0.0292(8) 0.0354(8) -0.0020(7) 0.0025(7) 0.0188(7)
 C20 0.0342(8) 0.0408(9) 0.0303(7) 0.0013(7) 0.0105(7) 0.0212(7)
 C21 0.0268(7) 0.0315(8) 0.0256(7) 0.0061(6) 0.0080(6) 0.0132(6)
 C22 0.0229(6) 0.0225(7) 0.0206(6) 0.0061(5) 0.0065(5) 0.0120(5)
 C23 0.0262(7) 0.0236(7) 0.0264(7) 0.0035(6) 0.0075(6) 0.0098(6)
 C24 0.0384(8) 0.0282(8) 0.0271(7) -0.0013(6) 0.0091(6) 0.0131(7)
 C25 0.0435(9) 0.0373(9) 0.0311(8) 0.0040(7) 0.0207(7) 0.0173(7)
 C26 0.0315(8) 0.0360(9) 0.0355(8) 0.0053(7) 0.0173(7) 0.0107(7)
 C27 0.0257(7) 0.0286(8) 0.0255(7) 0.0032(6) 0.0086(6) 0.0089(6)
 C28 0.0170(6) 0.0253(7) 0.0251(6) 0.0095(5) 0.0067(5) 0.0098(5)
 C29 0.0242(7) 0.0366(9) 0.0277(7) 0.0099(6) 0.0093(6) 0.0119(6)
 C30 0.0350(8) 0.0565(11) 0.0364(8) 0.0248(8) 0.0182(7) 0.0192(8)
 C31 0.0374(9) 0.0438(10) 0.0580(11) 0.0310(9) 0.0225(8) 0.0121(8)
 C32 0.0322(8) 0.0265(8) 0.0519(10) 0.0156(7) 0.0139(7) 0.0078(7)
 C33 0.0222(7) 0.0261(8) 0.0320(7) 0.0090(6) 0.0072(6) 0.0086(6)
 C34 0.0182(6) 0.0246(7) 0.0211(6) 0.0069(5) 0.0065(5) 0.0064(5)
 C35 0.0266(7) 0.0243(8) 0.0271(7) 0.0057(6) 0.0051(6) 0.0086(6)
 C36 0.0298(7) 0.0330(9) 0.0247(7) 0.0019(6) 0.0035(6) 0.0081(6)
 C37 0.0258(7) 0.0442(9) 0.0216(7) 0.0096(6) 0.0051(6) 0.0145(7)
 C38 0.0293(7) 0.0335(8) 0.0280(7) 0.0133(6) 0.0123(6) 0.0170(6)
 C39 0.0243(7) 0.0262(7) 0.0227(6) 0.0060(6) 0.0088(5) 0.0098(6)

_geom_special_details
;
 All esds (except the esd in the dihedral angle between two l.s. planes) 
 are estimated using the full covariance matrix.  The cell esds are taken 
 into account individually in the estimation of esds in distances, angles 
 and torsion angles; correlations between esds in cell parameters are only 
 used when they are defined by crystal symmetry.  An approximate (isotropic) 
 treatment of cell esds is used for estimating esds involving l.s. planes. 
;
loop_
  _geom_bond_atom_site_label_1
  _geom_bond_atom_site_label_2
  _geom_bond_distance
  _geom_bond_site_symmetry_2
  _geom_bond_publ_flag
 O1 C3 1.3973(14) . ?
 O1 C4 1.4246(14) . ?
 O1S C1S 1.4310(19) . ?
 O1S H1O 0.873(18) . ?
 O2 C4 1.4458(14) . ?
 O2 C6 1.3899(14) . ?
 O3 C1 1.2434(14) . ?
 O4 C8 1.3365(16) . ?
 O4 C9 1.4523(17) . ?
 O5 C8 1.2050(16) . ?
 N1 C1 1.3366(16) . ?
 N1 C5 1.4498(16) . ?
 N1 H1N 0.895(16) . ?
 C1 C2 1.4961(17) . ?
 C1S C2S 1.495(3) . ?
 C1S H1SA 0.997(18) . ?
 C1S H1SB 1.003(18) . ?
 C2 C3 1.3376(17) . ?
 C2 C10 1.4943(17) . ?
 C2S H2SA 1.04(2) . ?
 C2S H2SB 1.05(2) . ?
 C2S H2SC 0.99(2) . ?
 C3 C16 1.4821(17) . ?
 C4 C5 1.5320(18) . ?
 C4 C22 1.5143(16) . ?
 C5 H5A 0.985(13) . ?
 C5 H5B 0.966(14) . ?
 C6 C7 1.3401(17) . ?
 C6 C28 1.4787(17) . ?
 C7 C8 1.4943(18) . ?
 C7 C34 1.4885(17) . ?
 C9 H9A 0.994(16) . ?
 C9 H9B 1.009(18) . ?
 C9 H9C 0.955(18) . ?
 C10 C11 1.3906(19) . ?
 C10 C15 1.3923(19) . ?
 C11 C12 1.386(2) . ?
 C11 H11 0.973(15) . ?
 C12 C13 1.377(2) . ?
 C12 H12 0.970(16) . ?
 C13 C14 1.380(2) . ?
 C13 H13 0.949(17) . ?
 C14 C15 1.394(2) . ?
 C14 H14 0.970(16) . ?
 C15 H15 0.961(14) . ?
 C16 C17 1.3949(19) . ?
 C16 C21 1.3946(18) . ?
 C17 C18 1.3878(19) . ?
 C17 H17 0.968(14) . ?
 C18 C19 1.383(2) . ?
 C18 H18 0.977(15) . ?
 C19 C20 1.381(2) . ?
 C19 H19 0.981(17) . ?
 C20 C21 1.384(2) . ?
 C20 H20 0.951(15) . ?
 C21 H21 0.972(15) . ?
 C22 C23 1.3940(18) . ?
 C22 C27 1.3928(18) . ?
 C23 C24 1.3871(18) . ?
 C23 H23 0.987(14) . ?
 C24 C25 1.388(2) . ?
 C24 H24 0.994(14) . ?
 C25 C26 1.378(2) . ?
 C25 H25 0.966(15) . ?
 C26 C27 1.3881(19) . ?
 C26 H26 0.990(15) . ?
 C27 H27 0.970(15) . ?
 C28 C29 1.3949(18) . ?
 C28 C33 1.3877(18) . ?
 C29 C30 1.389(2) . ?
 C29 H29 0.970(14) . ?
 C30 C31 1.383(2) . ?
 C30 H30 0.966(15) . ?
 C31 C32 1.380(2) . ?
 C31 H31 0.977(18) . ?
 C32 C33 1.388(2) . ?
 C32 H32 1.007(16) . ?
 C33 H33 0.965(13) . ?
 C34 C35 1.3864(18) . ?
 C34 C39 1.3959(18) . ?
 C35 C36 1.3871(19) . ?
 C35 H35 0.955(15) . ?
 C36 C37 1.381(2) . ?
 C36 H36 0.977(14) . ?
 C37 C38 1.387(2) . ?
 C37 H37 0.958(15) . ?
 C38 C39 1.3842(18) . ?
 C38 H38 0.995(14) . ?
 C39 H39 0.960(13) . ?

loop_
  _geom_angle_atom_site_label_1
  _geom_angle_atom_site_label_2
  _geom_angle_atom_site_label_3
  _geom_angle
  _geom_angle_site_symmetry_1
  _geom_angle_site_symmetry_3
  _geom_angle_publ_flag
 O1 C3 C16 112.51(10) . . ?
 O1 C4 O2 108.84(9) . . ?
 O1 C4 C5 110.23(10) . . ?
 O1 C4 C22 107.04(9) . . ?
 O1S C1S C2S 112.63(16) . . ?
 O1S C1S H1SA 104.9(10) . . ?
 O1S C1S H1SB 109.8(10) . . ?
 O2 C4 C5 102.98(9) . . ?
 O2 C4 C22 113.66(9) . . ?
 O2 C6 C28 117.70(10) . . ?
 O3 C1 N1 122.88(12) . . ?
 O3 C1 C2 119.83(11) . . ?
 O4 C8 C7 110.01(11) . . ?
 O4 C9 H9A 109.5(9) . . ?
 O4 C9 H9B 110.9(10) . . ?
 O4 C9 H9C 105.5(11) . . ?
 O5 C8 O4 123.76(13) . . ?
 O5 C8 C7 126.23(12) . . ?
 N1 C1 C2 117.30(11) . . ?
 N1 C5 C4 111.68(10) . . ?
 N1 C5 H5A 110.0(8) . . ?
 N1 C5 H5B 109.1(8) . . ?
 C1 N1 C5 122.03(11) . . ?
 C1 N1 H1N 120.2(10) . . ?
 C1S O1S H1O 104.9(11) . . ?
 C1S C2S H2SA 110.0(12) . . ?
 C1S C2S H2SB 112.1(11) . . ?
 C1S C2S H2SC 108.9(11) . . ?
 C2 C3 O1 120.06(11) . . ?
 C2 C3 C16 127.03(11) . . ?
 C2S C1S H1SA 111.7(10) . . ?
 C2S C1S H1SB 111.4(10) . . ?
 C3 O1 C4 118.38(9) . . ?
 C3 C2 C1 120.25(11) . . ?
 C3 C2 C10 123.32(11) . . ?
 C4 C5 H5A 109.6(8) . . ?
 C4 C5 H5B 108.9(8) . . ?
 C5 N1 H1N 117.7(10) . . ?
 C6 O2 C4 121.84(9) . . ?
 C6 C7 C8 119.60(11) . . ?
 C6 C7 C34 124.39(11) . . ?
 C7 C6 O2 116.12(11) . . ?
 C7 C6 C28 125.56(11) . . ?
 C8 O4 C9 115.99(12) . . ?
 C10 C2 C1 116.38(11) . . ?
 C10 C11 H11 120.5(8) . . ?
 C10 C15 C14 120.04(15) . . ?
 C10 C15 H15 119.1(8) . . ?
 C11 C10 C2 121.92(12) . . ?
 C11 C10 C15 119.27(12) . . ?
 C11 C12 H12 118.7(9) . . ?
 C12 C11 C10 120.18(15) . . ?
 C12 C11 H11 119.3(9) . . ?
 C12 C13 C14 120.17(14) . . ?
 C12 C13 H13 118.7(11) . . ?
 C13 C12 C11 120.29(16) . . ?
 C13 C12 H12 121.0(9) . . ?
 C13 C14 C15 119.98(16) . . ?
 C13 C14 H14 122.5(9) . . ?
 C14 C13 H13 121.1(11) . . ?
 C14 C15 H15 120.9(8) . . ?
 C15 C10 C2 118.79(12) . . ?
 C15 C14 H14 117.5(10) . . ?
 C16 C17 H17 119.7(9) . . ?
 C16 C21 H21 119.5(9) . . ?
 C17 C16 C3 119.37(11) . . ?
 C17 C18 H18 120.4(9) . . ?
 C18 C17 C16 120.58(13) . . ?
 C18 C17 H17 119.7(9) . . ?
 C18 C19 H19 121.1(10) . . ?
 C19 C18 C17 120.03(15) . . ?
 C19 C18 H18 119.6(8) . . ?
 C19 C20 C21 120.88(14) . . ?
 C19 C20 H20 120.5(10) . . ?
 C20 C19 C18 119.64(14) . . ?
 C20 C19 H19 119.3(10) . . ?
 C20 C21 C16 119.97(14) . . ?
 C20 C21 H21 120.5(9) . . ?
 C21 C16 C3 121.74(12) . . ?
 C21 C16 C17 118.89(12) . . ?
 C21 C20 H20 118.7(10) . . ?
 C22 C4 C5 114.01(10) . . ?
 C22 C23 H23 119.8(8) . . ?
 C22 C27 H27 119.8(8) . . ?
 C23 C22 C4 119.74(11) . . ?
 C23 C24 C25 120.15(13) . . ?
 C23 C24 H24 119.4(8) . . ?
 C24 C23 C22 120.10(13) . . ?
 C24 C23 H23 120.1(8) . . ?
 C24 C25 H25 120.0(9) . . ?
 C25 C24 H24 120.5(8) . . ?
 C25 C26 C27 120.57(14) . . ?
 C25 C26 H26 120.5(8) . . ?
 C26 C25 C24 119.81(13) . . ?
 C26 C25 H25 120.2(9) . . ?
 C26 C27 C22 119.92(13) . . ?
 C26 C27 H27 120.2(8) . . ?
 C27 C22 C4 120.83(11) . . ?
 C27 C22 C23 119.42(12) . . ?
 C27 C26 H26 118.9(9) . . ?
 C28 C29 H29 119.7(8) . . ?
 C28 C33 C32 121.00(14) . . ?
 C28 C33 H33 117.9(8) . . ?
 C29 C28 C6 121.51(12) . . ?
 C29 C30 H30 118.1(10) . . ?
 C30 C29 C28 119.80(15) . . ?
 C30 C29 H29 120.5(8) . . ?
 C30 C31 H31 119.8(10) . . ?
 C31 C30 C29 120.32(15) . . ?
 C31 C30 H30 121.6(10) . . ?
 C31 C32 C33 119.48(15) . . ?
 C31 C32 H32 121.1(9) . . ?
 C32 C31 C30 120.26(15) . . ?
 C32 C31 H31 119.9(10) . . ?
 C32 C33 H33 121.1(8) . . ?
 C33 C28 C6 119.40(11) . . ?
 C33 C28 C29 119.05(13) . . ?
 C33 C32 H32 119.5(9) . . ?
 C34 C7 C8 115.99(11) . . ?
 C34 C35 C36 121.13(13) . . ?
 C34 C35 H35 118.9(8) . . ?
 C34 C39 H39 119.9(8) . . ?
 C35 C34 C7 119.41(12) . . ?
 C35 C34 C39 118.70(12) . . ?
 C35 C36 H36 118.7(8) . . ?
 C36 C35 H35 119.9(8) . . ?
 C36 C37 C38 119.61(13) . . ?
 C36 C37 H37 120.9(9) . . ?
 C37 C36 C35 119.83(14) . . ?
 C37 C36 H36 121.5(8) . . ?
 C37 C38 H38 120.0(8) . . ?
 C38 C37 H37 119.5(9) . . ?
 C38 C39 C34 120.10(13) . . ?
 C38 C39 H39 120.0(8) . . ?
 C39 C34 C7 121.88(11) . . ?
 C39 C38 C37 120.61(13) . . ?
 C39 C38 H38 119.4(8) . . ?
 H1SA C1S H1SB 106.0(14) . . ?
 H2SA C2S H2SB 106.4(16) . . ?
 H2SA C2S H2SC 112.1(16) . . ?
 H2SB C2S H2SC 107.3(15) . . ?
 H5A C5 H5B 107.4(11) . . ?
 H9A C9 H9B 108.8(13) . . ?
 H9A C9 H9C 109.5(14) . . ?
 H9B C9 H9C 112.6(15) . . ?

loop_
  _geom_hbond_atom_site_label_D
  _geom_hbond_atom_site_label_H
  _geom_hbond_atom_site_label_A
  _geom_hbond_distance_DH
  _geom_hbond_distance_HA
  _geom_hbond_distance_DA
  _geom_hbond_angle_DHA
  _geom_hbond_site_symmetry_A
 O1S H1O O3 0.873(18) 1.878(18) 2.7443(14) 171.3(17) 2_565
 N1 H1N O1S 0.895(16) 1.985(16) 2.8511(16) 162.4(14) .
